# Supplementary material
Source: PubMed Central journal article supplement (PMC2883584)
Supplement: halms404834-supplement_2.pdf [file halms404834-supplement_2.pdf]

# Supplementary Figure 1: Alignment of Human *TUBB2* Genes

```

TUBB2B      MREIVHIQAGCCGNQIGAKFWEVISDEHGI DPTGSYHGSDSLQLERINVYVNEATGNKYV 60
TUBB2A      MREIVHIQAGCCGNQIGAKFWEVISDEHGI DPTGSYHGSDSLQLERINVYVNEAAGNKYV 60
TUBB2C      MREIVHIQAGCCGNQIGAKFWEVISDEHGI DPTGTYHGSDSLQLERINVYVNEATGGKYV 60
*****;*****;*****;*.***

TUBB2B      PRAILLVDLEPGTMDSVRSRSGPFGQIFRPDNFVFGQSGAGNNWAKGHYTEGAELVDVSLVDVV 120
TUBB2A      PRAILLVDLEPGTMDSVRSRSGPFGQIFRPDNFVFGQSGAGNNWAKGHYTEGAELVDVSLVDVV 120
TUBB2C      PRAVLVDLEPGTMDSVRSRSGPFGQIFRPDNFVFGQSGAGNNWAKGHYTEGAELVDVSLVDVV 120
*****

TUBB2B      RKESESCDCLQGQQLTHSLGGGTGSGMGTL LISKIREEYPDRIMNTFSVMPSPKVS DTVV 180
TUBB2A      RKESESCDCLQGQQLTHSLGGGTGSGMGTL LISKIREEYPDRIMNTFSVMPSPKVS DTVV 180
TUBB2C      RKEAESCDCLQGQQLTHSLGGGTGSGMGTL LISKIREEYPDRIMNTFSVVPSPKVS DTVV 180
*****;*****;*****;*****

TUBB2B      EPYNATLSVHQLVENTDETYCIDNEALYDI CFTRLKLTPTTYGDLNHLVSA TMSGVTTCL 240
TUBB2A      EPYNATLSVHQLVENTDETYCIDNEALYDI CFTRLKLTPTTYGDLNHLVSA TMSGVTTCL 240
TUBB2C      EPYNATLSVHQLVENTDETYCIDNEALYDI CFTRLKLTPTTYGDLNHLVSA TMSGVTTCL 240
*****;*****;*****;*****

TUBB2B      RFPGQLNADLRKLA VNMVFPRLHFFMPGFAPLTSRGSQQYRAL TVPELTQQMFDSKNMM 300
TUBB2A      RFPGQLNADLRKLA VNMVFPRLHFFMPGFAPLTSRGSQQYRAL TVPELTQQMFDSKNMM 300
TUBB2C      RFPGQLNADLRKLA VNMVFPRLHFFMPGFAPLTSRGSQQYRAL TVPELTQQMFDAKNMM 300
*****;*****;*****;*****

TUBB2B      AACDPRHGRYLTVA AIFRGRMSMKEVDEQMLNVQNKNSSYFVEWIPNNVKTA VCDIPPRG 360
TUBB2A      AACDPRHGRYLTVA AIFRGRMSMKEVDEQMLNVQNKNSSYFVEWIPNNVKTA VCDIPPRG 360
TUBB2C      AACDPRHGRYLTVA AAVFRGRMSMKEVDEQMLNVQNKNSSYFVEWIPNNVKTA VCDIPPRG 360
*****;*****;*****;*****

TUBB2B      LKMSATFIGNSTAI QELFKRISQFTAMFRRKAFLHWYTGEGMDEMEFTEAESNMNDLVS 420
TUBB2A      LKMSATFIGNSTAI QELFKRISQFTAMFRRKAFLHWYTGEGMDEMEFTEAESNMNDLVS 420
TUBB2C      LKMSATFIGNSTAI QELFKRISQFTAMFRRKAFLHWYTGEGMDEMEFTEAESNMNDLVS 420
*****;*****;*****;*****

TUBB2B      EYQQYQDATADEQGEFEEEEGEDEA 445
TUBB2A      EYQQYQDATADEQGEFEEEEGEDEA 445
TUBB2C      EYQQYQDATAEEEFEEEEEEVA 445
*****;***** *; *

```

**Supplementary Figure 1: Alignment of Human *TUBB2* Genes.** *TUBB2A*, *TUBB2B* and *TUBB2C* were aligned using ClustalW. (\*) shows identity among residues, (:) and (.) depict divergent residues. Note the presence of referenced non-synonymous polymorphisms above *TUBB2B*'s sequence (referenced in NCBI SNPs database [<http://www.ncbi.nlm.nih.gov/sites/entrez?db=snp>] and Ensembl Genome browser [<http://www.ensembl.org>]). During our screening, we just found one occurrence of one polymorphism (C201S).
