# Supplementary material
Source: PubMed Central journal article supplement (PMC2883584)
Supplement: halms404834-supplement_3.pdf [file halms404834-supplement_3.pdf]

# Supplementary Figure 2: Strict Evolutionary Conservation of $\beta$ -tubulin.

|                        |     |                                                                                                     |
|------------------------|-----|-----------------------------------------------------------------------------------------------------|
| <i>H. sapiens</i>      | 1   | MREIVHIAQCCGQNIQAKFVEVISEDEIGDPTGSYHGDSDLQLERINVYTNATGNKYVPRAILVLDLEPGTMSVRSQFGIIFRPDNVYVQSGAGNN    |
| <i>R. norvegicus</i>   | 1   | MREIVHIAQCCGQNIQAKFVEVISEDEIGDPTGSYHGDSDLQLERINVYTNATGNKYVPRAILVLDLEPGTMSVRSQFGIIFRPDNVYVQSGAGNN    |
| <i>M. musculus</i>     | 1   | MREIVHIAQCCGQNIQAKFVEVISEDEIGDPTGSYHGDSDLQLERINVYTNATGNKYVPRAILVLDLEPGTMSVRSQFGIIFRPDNVYVQSGAGNN    |
| <i>B. taurus</i>       | 1   | MREIVHIAQCCGQNIQAKFVEVISEDEIGDPTGSYHGDSDLQLERINVYTNATGNKYVPRAILVLDLEPGTMSVRSQFGIIFRPDNVYVQSGAGNN    |
| <i>G. gallus</i>       | 1   | MREIVHIAQCCGQNIQAKFVEVISEDEIGDPTGSYHGDSDLQLERINVYTNATGNKYVPRAILVLDLEPGTMSVRSQFGIIFRPDNVYVQSGAGNN    |
| <i>X. tropicalis</i>   | 1   | MREIVHIAQCCGQNIQAKFVEVISEDEIGDPTGSYHGDSDLQLERINVYTNATGNKYVPRAILVLDLEPGTMSVRSQFGIIFRPDNVYVQSGAGNN    |
| <i>D. rerio</i>        | 1   | MREIVHIAQCCGQNIQAKFVEVISEDEIGDPTGSYHGDSDLQLERINVYTNATGNKYVPRAILVLDLEPGTMSVRSQFGIIFRPDNVYVQSGAGNN    |
| <i>D. melanogaster</i> | 1   | MREIVHIAQCCGQNIQAKFVEVISEDEIGDPTGSYHGDSDLQLERINVYTNATGNKYVPRAILVLDLEPGTMSVRSQFGIIFRPDNVYVQSGAGNN    |
| <i>C. elegans</i>      | 1   | MREIVHIAQCCGQNIQAKFVEVISEDEIGDPTGSYHGDSDLQLERINVYTNATGNKYVPRAILVLDLEPGTMSVRSQFGIIFRPDNVYVQSGAGNN    |
| <i>S. cerevisiae</i>   | 1   | MREIVHIAQCCGQNIQAKFVEVISEDEIGDPTGSYHGDSDLQLERINVYTNATGNKYVPRAILVLDLEPGTMSVRSQFGIIFRPDNVYVQSGAGNN    |
| ▼                      |     |                                                                                                     |
| <i>H. sapiens</i>      | 101 | WAKGHTYEGAEIVDSVLDVVRKKESECDCLQGFQPLTSLGGGTGSGMGLTLLISKIREEYDRIMNTFVMPSPKVSQTVVEP NATLSVQLVVENTDETF |
| <i>R. norvegicus</i>   | 101 | WAKGHTYEGAEIVDSVLDVVRKKESECDCLQGFQPLTSLGGGTGSGMGLTLLISKIREEYDRIMNTFVMPSPKVSQTVVEP NATLSVQLVVENTDETF |
| <i>M. musculus</i>     | 101 | WAKGHTYEGAEIVDSVLDVVRKKESECDCLQGFQPLTSLGGGTGSGMGLTLLISKIREEYDRIMNTFVMPSPKVSQTVVEP NATLSVQLVVENTDETF |
| <i>B. taurus</i>       | 101 | WAKGHTYEGAEIVDSVLDVVRKKESECDCLQGFQPLTSLGGGTGSGMGLTLLISKIREEYDRIMNTFVMPSPKVSQTVVEP NATLSVQLVVENTDETF |
| <i>G. gallus</i>       | 101 | WAKGHTYEGAEIVDSVLDVVRKKESECDCLQGFQPLTSLGGGTGSGMGLTLLISKIREEYDRIMNTFVMPSPKVSQTVVEP NATLSVQLVVENTDETF |
| <i>X. tropicalis</i>   | 101 | WAKGHTYEGAEIVDSVLDVVRKKESECDCLQGFQPLTSLGGGTGSGMGLTLLISKIREEYDRIMNTFVMPSPKVSQTVVEP NATLSVQLVVENTDETF |
| <i>D. rerio</i>        | 101 | WAKGHTYEGAEIVDSVLDVVRKKESECDCLQGFQPLTSLGGGTGSGMGLTLLISKIREEYDRIMNTFVMPSPKVSQTVVEP NATLSVQLVVENTDETF |
| <i>D. melanogaster</i> | 101 | WAKGHTYEGAEIVDSVLDVVRKKESECDCLQGFQPLTSLGGGTGSGMGLTLLISKIREEYDRIMNTFVMPSPKVSQTVVEP NATLSVQLVVENTDETF |
| <i>C. elegans</i>      | 101 | WAKGHTYEGAEIVDSVLDVVRKKESECDCLQGFQPLTSLGGGTGSGMGLTLLISKIREEYDRIMNTFVMPSPKVSQTVVEP NATLSVQLVVENTDETF |
| <i>S. cerevisiae</i>   | 101 | WAKGHTYEGAEIVDSVLDVVRKKESECDCLQGFQPLTSLGGGTGSGMGLTLLISKIREEYDRIMNTFVMPSPKVSQTVVEP NATLSVQLVVENTDETF |
| ▼                      |     |                                                                                                     |
| <i>H. sapiens</i>      | 201 | CIENALYDLCIFRTKRLTTPFYGDHLHLSVATMSGVTTCLRFPQGLNADLKRLLAVNNVYFRLRFFMFGFAPLTSRGSQYRALVPELQOMFDSKNNM   |
| <i>R. norvegicus</i>   | 201 | CIENALYDLCIFRTKRLTTPFYGDHLHLSVATMSGVTTCLRFPQGLNADLKRLLAVNNVYFRLRFFMFGFAPLTSRGSQYRALVPELQOMFDSKNNM   |
| <i>M. musculus</i>     | 201 | CIENALYDLCIFRTKRLTTPFYGDHLHLSVATMSGVTTCLRFPQGLNADLKRLLAVNNVYFRLRFFMFGFAPLTSRGSQYRALVPELQOMFDSKNNM   |
| <i>B. taurus</i>       | 201 | CIENALYDLCIFRTKRLTTPFYGDHLHLSVATMSGVTTCLRFPQGLNADLKRLLAVNNVYFRLRFFMFGFAPLTSRGSQYRALVPELQOMFDSKNNM   |
| <i>G. gallus</i>       | 201 | CIENALYDLCIFRTKRLTTPFYGDHLHLSVATMSGVTTCLRFPQGLNADLKRLLAVNNVYFRLRFFMFGFAPLTSRGSQYRALVPELQOMFDSKNNM   |
| <i>X. tropicalis</i>   | 201 | CIENALYDLCIFRTKRLTTPFYGDHLHLSVATMSGVTTCLRFPQGLNADLKRLLAVNNVYFRLRFFMFGFAPLTSRGSQYRALVPELQOMFDSKNNM   |
| <i>D. rerio</i>        | 201 | CIENALYDLCIFRTKRLTTPFYGDHLHLSVATMSGVTTCLRFPQGLNADLKRLLAVNNVYFRLRFFMFGFAPLTSRGSQYRALVPELQOMFDSKNNM   |
| <i>D. melanogaster</i> | 201 | CIENALYDLCIFRTKRLTTPFYGDHLHLSVATMSGVTTCLRFPQGLNADLKRLLAVNNVYFRLRFFMFGFAPLTSRGSQYRALVPELQOMFDSKNNM   |
| <i>C. elegans</i>      | 201 | CIENALYDLCIFRTKRLTTPFYGDHLHLSVATMSGVTTCLRFPQGLNADLKRLLAVNNVYFRLRFFMFGFAPLTSRGSQYRALVPELQOMFDSKNNM   |
| <i>S. cerevisiae</i>   | 201 | CIENALYDLCIFRTKRLTTPFYGDHLHLSVATMSGVTTCLRFPQGLNADLKRLLAVNNVYFRLRFFMFGFAPLTSRGSQYRALVPELQOMFDSKNNM   |
| ▼                      |     |                                                                                                     |
| <i>H. sapiens</i>      | 301 | AACDPBHRGRLVVAIFRGRMSKEVDEQMLNVQKNSYFVEIIPNNKTVACDIPRGLQMSATFIGNSTAIGLFRKRSIQGTAMFRKRAF LHWYTG      |
| <i>R. norvegicus</i>   | 301 | AACDPBHRGRLVVAIFRGRMSKEVDEQMLNVQKNSYFVEIIPNNKTVACDIPRGLQMSATFIGNSTAIGLFRKRSIQGTAMFRKRAF LHWYTG      |
| <i>M. musculus</i>     | 301 | AACDPBHRGRLVVAIFRGRMSKEVDEQMLNVQKNSYFVEIIPNNKTVACDIPRGLQMSATFIGNSTAIGLFRKRSIQGTAMFRKRAF LHWYTG      |
| <i>B. taurus</i>       | 301 | AACDPBHRGRLVVAIFRGRMSKEVDEQMLNVQKNSYFVEIIPNNKTVACDIPRGLQMSATFIGNSTAIGLFRKRSIQGTAMFRKRAF LHWYTG      |
| <i>G. gallus</i>       | 301 | AACDPBHRGRLVVAIFRGRMSKEVDEQMLNVQKNSYFVEIIPNNKTVACDIPRGLQMSATFIGNSTAIGLFRKRSIQGTAMFRKRAF LHWYTG      |
| <i>X. tropicalis</i>   | 301 | AACDPBHRGRLVVAIFRGRMSKEVDEQMLNVQKNSYFVEIIPNNKTVACDIPRGLQMSATFIGNSTAIGLFRKRSIQGTAMFRKRAF LHWYTG      |
| <i>D. rerio</i>        | 301 | AACDPBHRGRLVVAIFRGRMSKEVDEQMLNVQKNSYFVEIIPNNKTVACDIPRGLQMSATFIGNSTAIGLFRKRSIQGTAMFRKRAF LHWYTG      |
| <i>D. melanogaster</i> | 301 | AACDPBHRGRLVVAIFRGRMSKEVDEQMLNVQKNSYFVEIIPNNKTVACDIPRGLQMSATFIGNSTAIGLFRKRSIQGTAMFRKRAF LHWYTG      |
| <i>C. elegans</i>      | 301 | AACDPBHRGRLVVAIFRGRMSKEVDEQMLNVQKNSYFVEIIPNNKTVACDIPRGLQMSATFIGNSTAIGLFRKRSIQGTAMFRKRAF LHWYTG      |
| <i>S. cerevisiae</i>   | 301 | AACDPBHRGRLVVAIFRGRMSKEVDEQMLNVQKNSYFVEIIPNNKTVACDIPRGLQMSATFIGNSTAIGLFRKRSIQGTAMFRKRAF LHWYTG      |
| ▼                      |     |                                                                                                     |
| <i>H. sapiens</i>      | 401 | EGCDMEFTFASNNNDLVSEYCYQDATADEGGEFEFEGDEFA---                                                        |
| <i>R. norvegicus</i>   | 401 | EGCDMEFTFASNNNDLVSEYCYQDATADEGGEFEFEGDEFA---                                                        |
| <i>M. musculus</i>     | 401 | EGCDMEFTFASNNNDLVSEYCYQDATADEGGEFEFEGDEFA---                                                        |
| <i>B. taurus</i>       | 401 | EGCDMEFTFASNNNDLVSEYCYQDATADEGGEFEFEGDEFA---                                                        |
| <i>G. gallus</i>       | 401 | EGCDMEFTFASNNNDLVSEYCYQDATADEGGEFEFEGDEFA---                                                        |
| <i>X. tropicalis</i>   | 401 | EGCDMEFTFASNNNDLVSEYCYQDATADEGGEFEFEGDEFA---                                                        |
| <i>D. rerio</i>        | 401 | EGCDMEFTFASNNNDLVSEYCYQDATADEGGEFEFEGDEFA---                                                        |
| <i>D. melanogaster</i> | 401 | EGCDMEFTFASNNNDLVSEYCYQDATADEGGEFEFEGDEFA---                                                        |
| <i>C. elegans</i>      | 401 | EGCDMEFTFASNNNDLVSEYCYQDATADEGGEFEFEGDEFA---                                                        |
| <i>S. cerevisiae</i>   | 401 | EGCDMEFTFASNNNDLVSEYCYQDATADEGGEFEFEGDEFA---                                                        |

Supplementary Figure 2: Strict Evolutionary Conservation of  $\beta$ -tubulin. *Mus musculus*, *Rattus norvegicus*, *Bos taurus*, *Xenopus tropicalis*, *Gallus gallus*, *Danio rerio*, *Drosophila melanogaster*, *Caenorhabditis elegans*, *Saccharomyces cerevisiae*. The amino acids highlighted in black are conserved among species. Those highlighted in white are divergent. Note that the lower the position is in evolution, the greater the divergence between primary sequences. Arrowheads indicate positions of mutated residues.
