# Supplementary material
Source: PubMed Central journal article supplement (PMC2883584)
Supplement: halms404834-supplement_5.pdf [file halms404834-supplement_5.pdf]

## Supplementary Figure 4: Neuronal Overmigration into Leptomeningeal Spaces

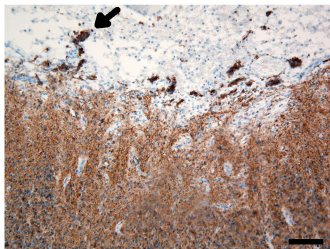

**Supplementary Figure 4: Neuronal Overmigration into Leptomeningeal Spaces.** Neurospecific MAP-2 immunostaining on a 27GW cortical section. Note the presence of neuronal cells clusters (black arrow) beyond the basement membrane, in the meninges. Scale bar : 100  $\mu\text{m}$ .
