# Supplementary material
Source: PubMed Central journal article supplement (PMC2883584)
Supplement: halms404834-supplement_6.pdf [file halms404834-supplement_6.pdf]

# Supplementary Figure 5. Expression of *Tubb2b* in Developing Mouse Brain

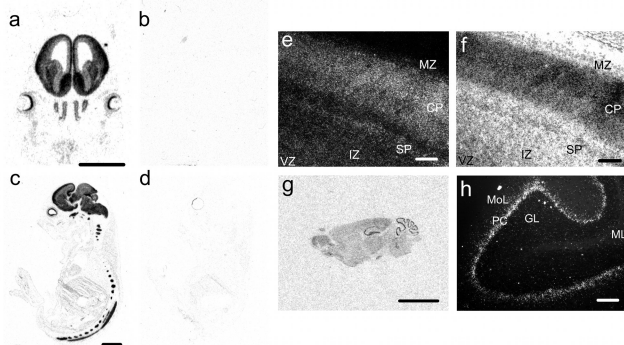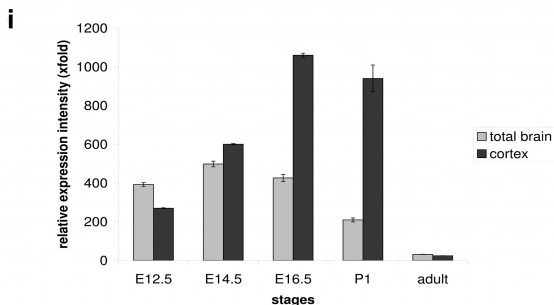

## Supplementary Figure 5: Expression of *Tubb2b* in Developing Mouse Brain.

(a-h), *In situ* hybridization analysis of *Tubb2b* expression. Coronal sections of E14.5 (a, b) and sagittal sections of E16.5 (c,d) mouse embryos labeled with *Tubb2b* antisense (a,c) and sense probes (b,d). (e-f) cortical sagittal sections at E16.5 stage showing *Tubb2b* expression (e) and hemalun staining (f) in each zone of the developing cortex. (g-h) sagittal sections at adult stage showing restricted expression of *Tubb2b* in whole brain (g) for example in Purkinje cells of the cerebellum (h). MZ: marginal zone, CP: cortical plate, SP: subplate, IZ: intermediate zone, VZ: ventricular zone, PC: Purkinje cells, MoL: Molecular layer, GL: Granular layer, ML: Medullar layer. Scale bars: (a-c) 2 mm; (e,f,h) 0.1 mm, (g) 0.5 cm. Note the expression in

telencephalon, diencephalon, and mesencephalon, in developing cerebellum, brainstem, spinal cord, retina and dorsal root ganglia. **1**, Quantitative RT-PCR analyses of *Tubb2b* expression in total brain and cortex at different developmental stages. Results are expressed as a ratio of *Tubb2b* expression in total brain (light grey bars) or in cortex (dark grey bars) versus expression in the whole embryo at E8.5 (stage used as a reference to show the significant increase of *Tubb2b* expression during development).
