# Supplementary material
Source: PubMed Central journal article supplement (PMC2883584)
Supplement: halms404834-supplement_7.pdf [file halms404834-supplement_7.pdf]

# Supplementary Figure 6: *In vitro* Validation of Small Hairpin RNA-based RNA Interference

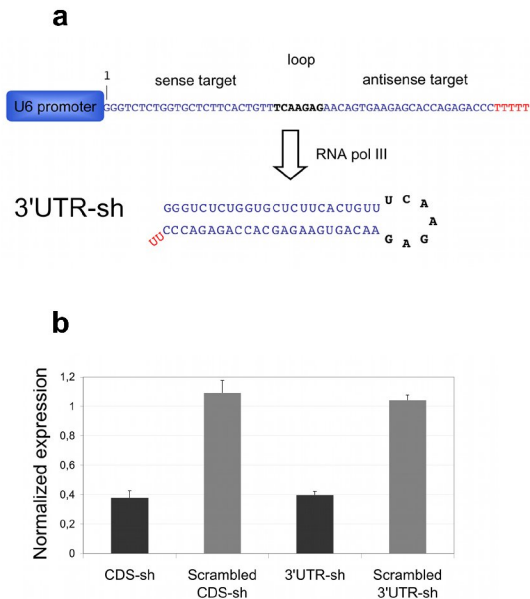

**Supplementary Figure 6: *In Vitro* Validation of Small Hairpin RNA-based RNA Interference.** (a) Schematic representation of the electroporated construct and the ribonucleotidic hairpin targeting the 3'UTR of *Tubb2b* mRNA (3'UTR-sh). (b) Validation of *Tubb2b* knockdown by transfection of shRNA constructs in C6 cells that endogenously express *Tubb2b*. qRT-PCR followed magnetic-activated sorting of transfected cells. Each of the shRNAs lead to a knockdown of about 60% (relative to an unrelated mismatch control) whereas the scrambled controls do not repress expression.
