# Supplementary material
Source: PubMed Central journal article supplement (PMC2883584)
Supplement: halms404834-supplement_8.pdf [file halms404834-supplement_8.pdf]

# Supplementary Figure 7: Distribution of Fluorescent Migrating Neurons Across the Cortex

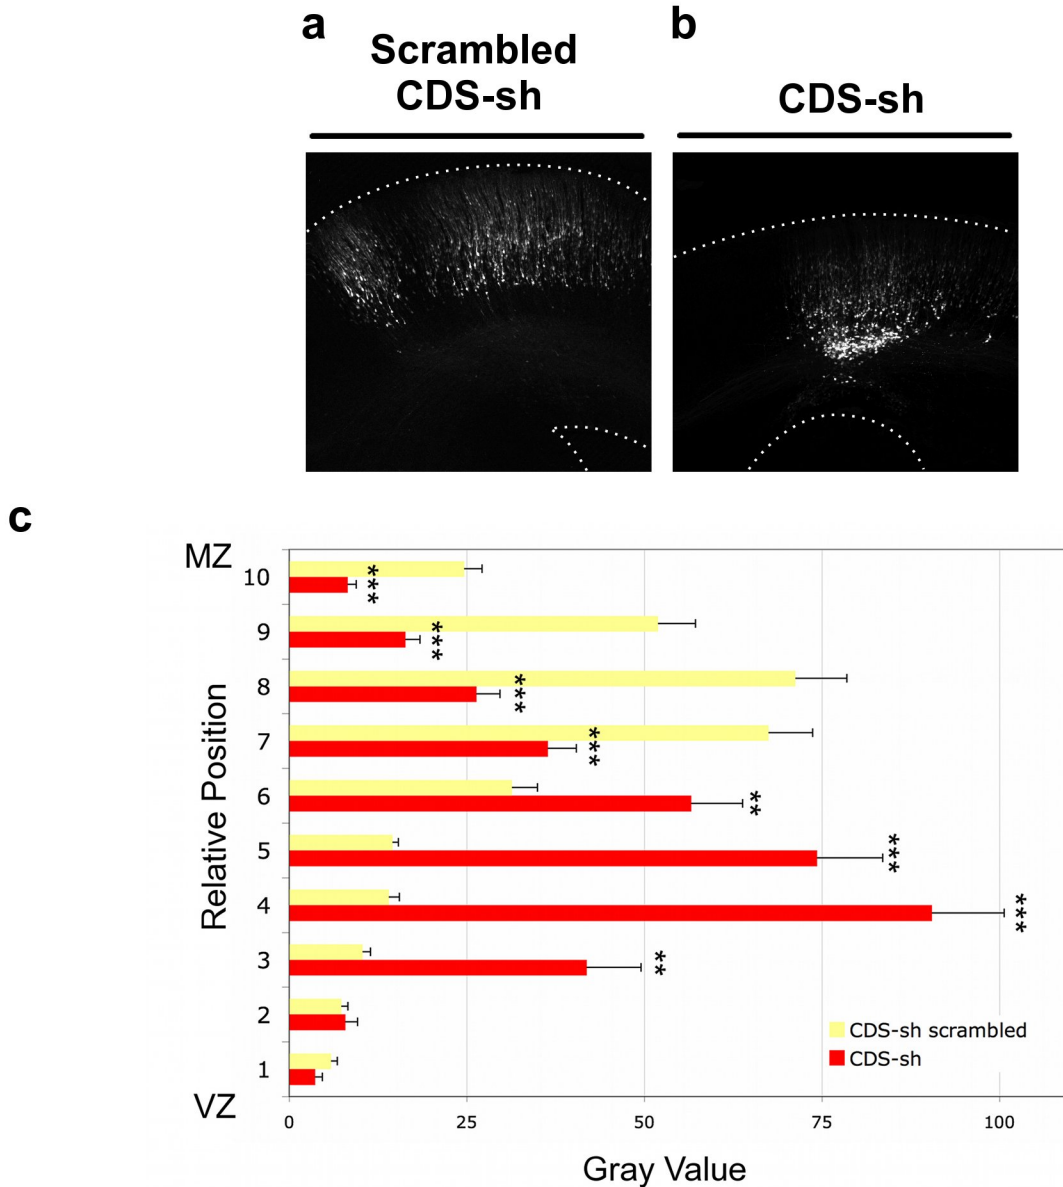

## Supplementary Figure 7: Distribution of Fluorescent Migrating Neurons Across the Cortex.

(a-b), Coronal sections of E20 brains 5 days after electroporation of a RFP coding reporter construct in combination with either scrambled CDS-sh (a) or CDS-sh (b). (c), Fluorescence intensities reflecting positions within the cortex of cells electroporated with RFP either alone or in combination with scrambled CDS-sh or CDS-sh were converted into gray scales and measured across cortices from the VZ to the MZ. Bars represent the mean  $\pm$  SEM of fluorescence intensities in 10 strata dividing the thickness of cortices of independent brains (CDS-sh n=6, Scrambled CDS-sh n=5). Note that knockdown of *Tubb2b* using the CDS-sh between E15 and E20 disrupts neuronal migration (a). RFP positive cells are significantly stalled within the deep layers of the cortex (stratum 4: Mann-Whitney U=34,  $n_{\text{CDS-sh}}=17$ ,  $n_{\text{Scrambled CDS-sh}}=19$ ,  $p < 0.0001$ (\*\*\*) two-tailed) that correspond to the SV/IZ whereas neurons had already reached the CP in control conditions (Fig. 2i) (stratum 8: Mann-Whitney U=28,  $n_{\text{CDS-sh}}=17$ ,  $n_{\text{Scrambled CDS-sh}}=19$ ,  $p < 0.0001$ (\*\*\*) two-tailed).
