# Supplementary material
Source: PubMed Central journal article supplement (PMC2883584)
Supplement: halms404834-supplement_9.pdf [file halms404834-supplement_9.pdf]

# Supplementary Figure 8: Kinetic Analysis of Folding Intermediate Formation *In Vitro* Reveals Defective Interactions of Mutant TUBB2B with Tubulin-Specific Chaperones

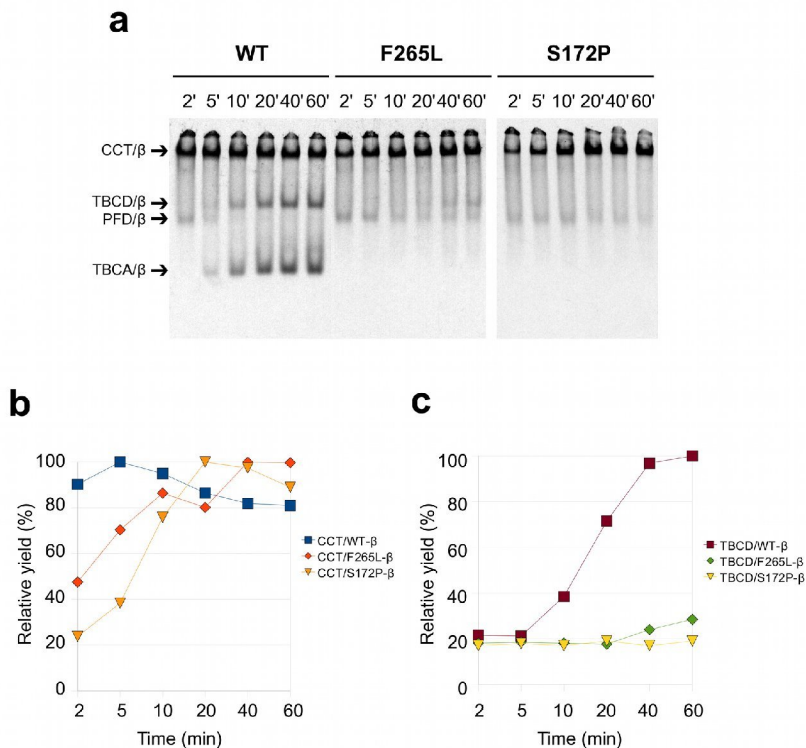

**Supplementary Figure 8: Kinetic Analysis of Folding Intermediate Formation *In Vitro* Reveals Defective Interactions of Mutant TUBB2B with Tubulin-Specific Chaperones.** (a), Kinetic analysis on non-denaturing gels of the products of *in vitro* folding reactions done in unfractionated reticulocyte lysate via sudden presentation of intact, unfolded wild type (WT) or mutant (F265L or S172P) <sup>35</sup>S-methionine-labelled probes. (b,c), Quantitation of the data shown in (a). For each target protein (WT, F265L or S172P), the maximum amount of label measured in CCT/β-tubulin or TBCD/β-tubulin complexes during the course of the reaction is taken as 100. Arrows in (a) denote the migration positions of the CCT/β-tubulin binary complex, the TBCD/β-tubulin co-complex, the prefoldin/β-tubulin binary complex (PFD/β) and the TBCA/β-tubulin co-complex<sup>1-3</sup>.
