# Supplementary material
Source: PubMed Central journal article supplement (PMC2883584)
Supplement: halms404834-supplement_13.pdf [file halms404834-supplement_13.pdf]

# Supplementary Figure 12: Dynamic Behavior of Mutant-containing Microtubules in Cultured Cells.

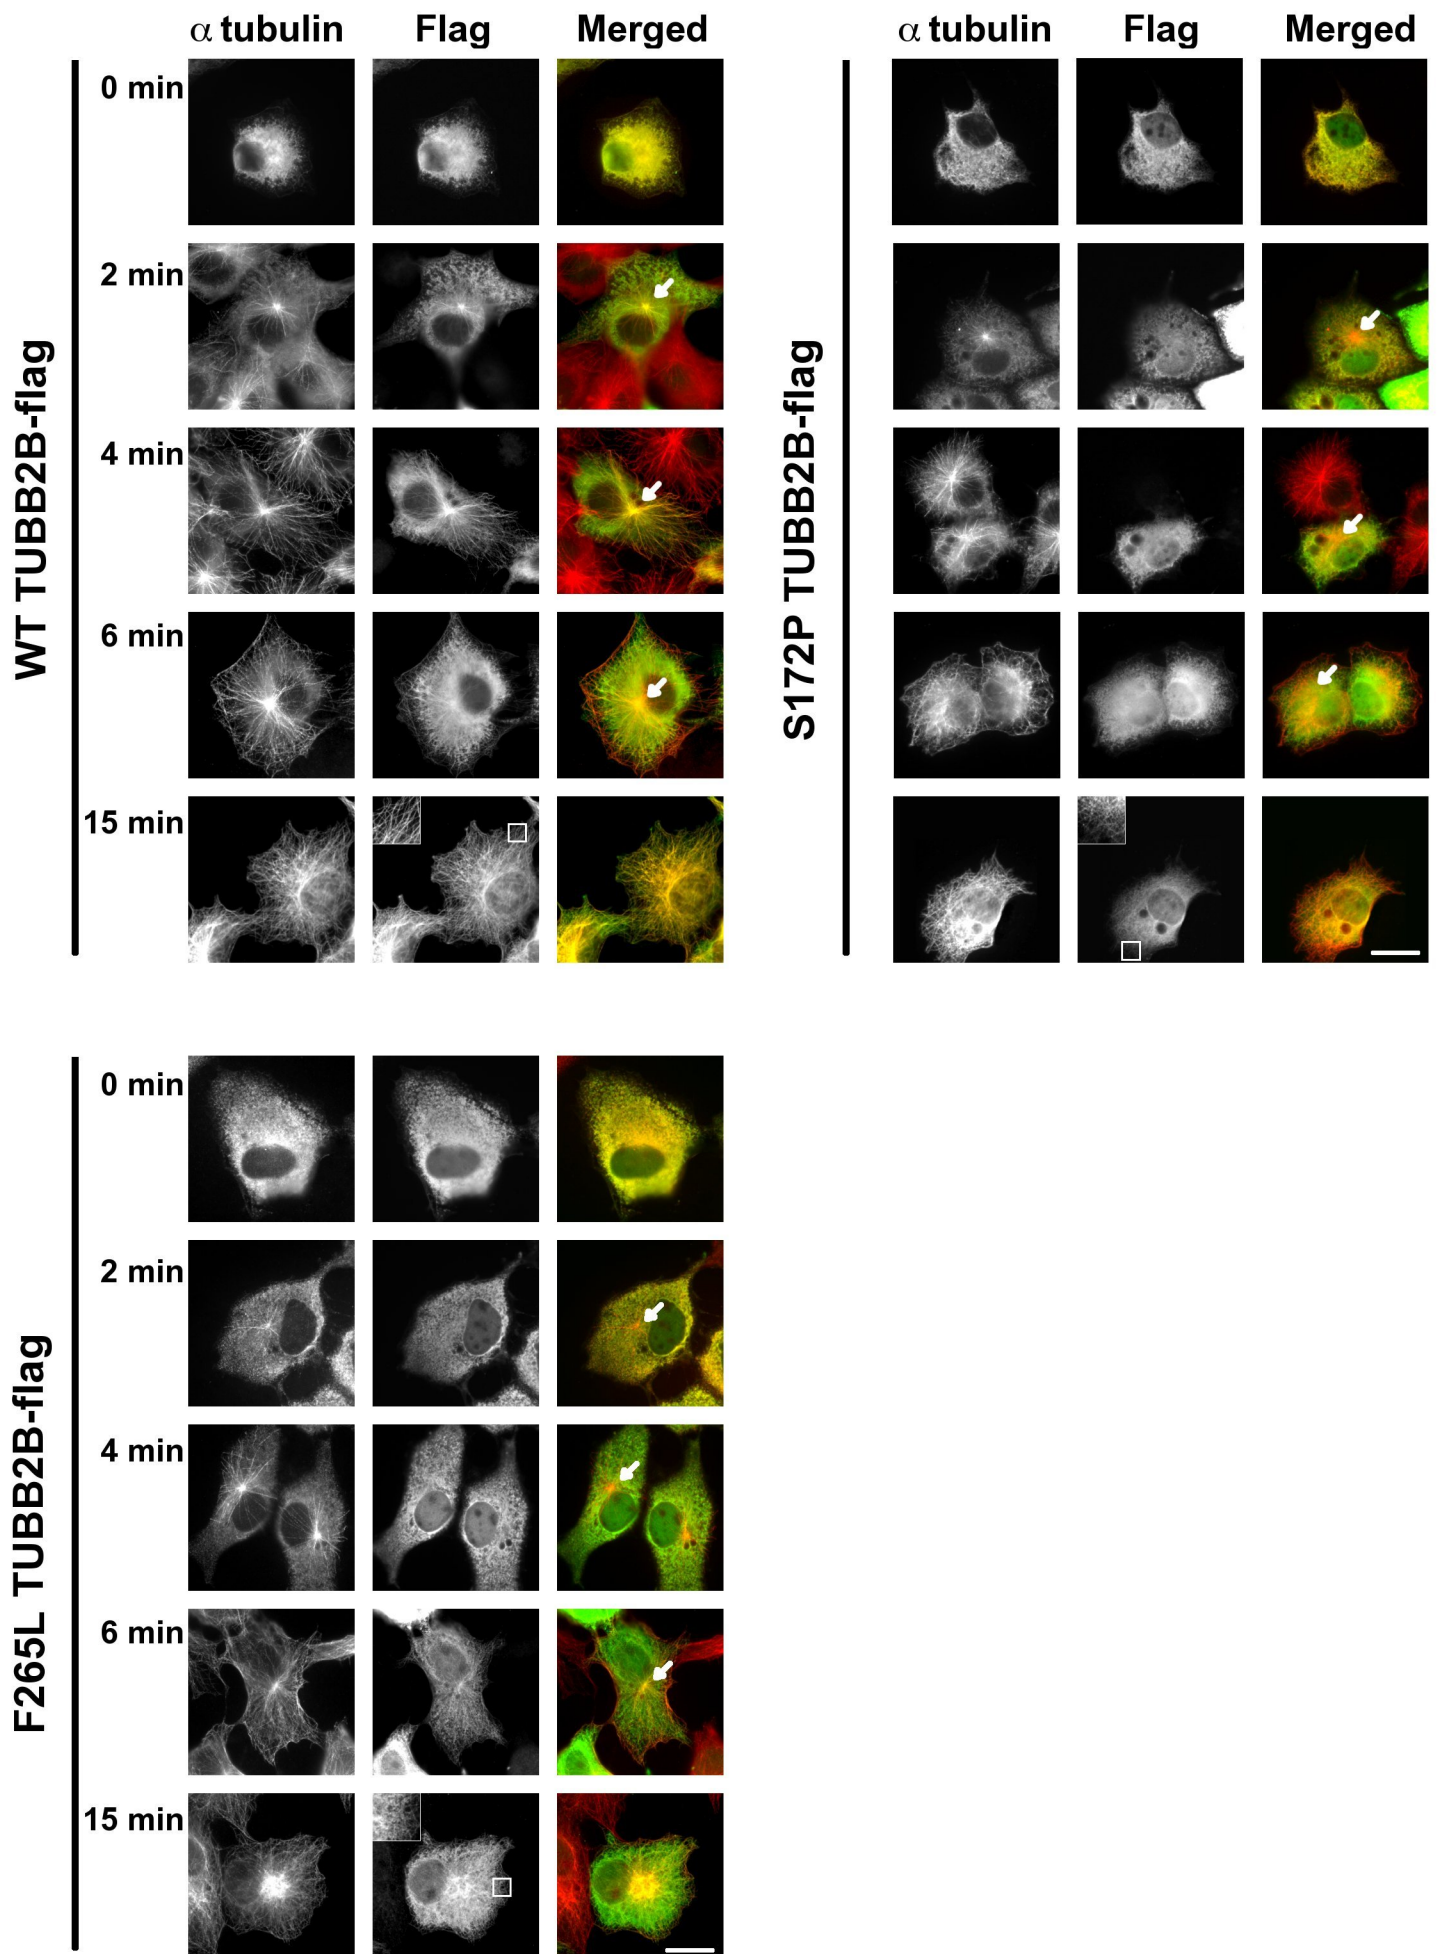

**Supplementary Figure 12: Dynamic Behavior of Mutant-containing Microtubules in Cultured Cells.** We assessed the effect of expression of p.S172P and p.F265L TUBB2B on microtubule dynamics. Microtubules were depolymerized by incubation of cultures at 4°C for 30 min 24 h post transfection, and then restored to 37°C. At the times indicated in the Figure, cells were fixed and examined by immunofluorescence with an anti-FLAG antiserum (to visualize the exogenous protein; green) and an anti- $\alpha$ -tubulin antibody (to visualize the overall microtubule network; red). Scale bars, 20 $\mu$ m. See Supplementary Note for more details.
