# Supplementary material
Source: PubMed Central journal article supplement (PMC2883584)
Supplement: halms404834-supplement_14.pdf [file halms404834-supplement_14.pdf]

## Supplementary Table 1: Summary of molecular and cellular defects associated with the different mutations.

|                  | Co-complexes |              |               |               | $\alpha/\beta$<br>heterodimer<br>yield | Incorporation<br>into MTs in<br>cells |
|------------------|--------------|--------------|---------------|---------------|----------------------------------------|---------------------------------------|
|                  | PFD/ $\beta$ | CCT/ $\beta$ | TBCA/ $\beta$ | TBCD/ $\beta$ |                                        |                                       |
| <b>Wild-type</b> | +            | +            | ++            | ++            | ++++                                   | ++++                                  |
| p.I210T          | +            | +            | +             | +             | +++                                    | ++++                                  |
| p.T312M          | +            | +            | +             | +             | +++                                    | ++++                                  |
| p.L228P          | +            | +            | +             | +             | +                                      | +++                                   |
| <b>p.F265L</b>   | +            | +            | absent        | absent        | trace                                  | weak                                  |
| <b>p.S172P</b>   | +            | +            | absent        | absent        | undetectable                           | weak                                  |

**Supplementary Table 1: Summary of molecular and cellular defects associated with the different mutations.** Tubulin chaperone-dependent folding pathway and cellular abnormalities
