# Supplementary material
Source: PubMed Central journal article supplement (PMC2883584)
Supplement: halms404834-supplement_15.pdf [file halms404834-supplement_15.pdf]

**Supplementary Table 2: Comparative Features of *TUBA1A*, *TUBB2B*, *GPR56* and *SRPX2*-related forms of cortical dysgeneses.**

|                             | <i>TUBA1A</i>                                                              | <i>TUBB2B</i>                                                              | <i>GPR56</i>                                          | <i>SRPX2</i>                         |
|-----------------------------|----------------------------------------------------------------------------|----------------------------------------------------------------------------|-------------------------------------------------------|--------------------------------------|
| <b>Genetic transmission</b> | Autosomal dominant, <i>de novo</i> mutations                               | Autosomal dominant, <i>de novo</i> mutations                               | Autosomal recessive                                   | X linked                             |
| <b>Brain size</b>           | Microcephaly                                                               | Microcephaly                                                               | Normal                                                | Normal                               |
| <b>Developmental delay</b>  | Moderate to severe                                                         | Moderate to severe                                                         | Severe                                                | Absent to moderate                   |
| <b>Epilepsy</b>             | +/-                                                                        | +                                                                          | +                                                     | +                                    |
| <b>Cortex abnormalities</b> | Bilateral agyria, perisylvian to posterior pachygyria or laminar heteropia | Asymmetrical and predominant frontal, parietal and temporal polymicrogyria | Bilateral fronto-parietal polymicrogyria              | Bilateral perisylvian polymicrogyria |
| <b>White Matter</b>         | No apparent abnormality                                                    | No apparent abnormality                                                    | Presence of lesions, decreased volume in white matter | No apparent abnormality              |
| <b>Basal ganglia</b>        | Dysmorphic                                                                 | Dysmorphic                                                                 | Normal                                                | Normal                               |
| <b>Corpus callosum</b>      | Dysplasia to total agenesis                                                | Dysplasia to total agenesis                                                | Normal                                                | Normal                               |
| <b>Cerebellum</b>           | Vermian hypoplasia or dysplasia                                            | Vermian dysplasia                                                          | Vermian hypoplasia                                    | Normal                               |
| <b>Brainstem</b>            | Hypoplasia                                                                 | Hypoplasia                                                                 | Hypoplasia                                            | Normal                               |
